# Supplementary material for: Fluorescence characteristics of dissolved organic matter during anaerobic digestion of oil crop straw inoculated with rumen liquid
Source: Royal Society of Chemistry journal article supplement (doi:10.1039/d1ra01176f), 2021-01-01
Supplement: d1ra01176f1.pdf [file d1ra01176f1.pdf]

## Electronic Supplementary Information

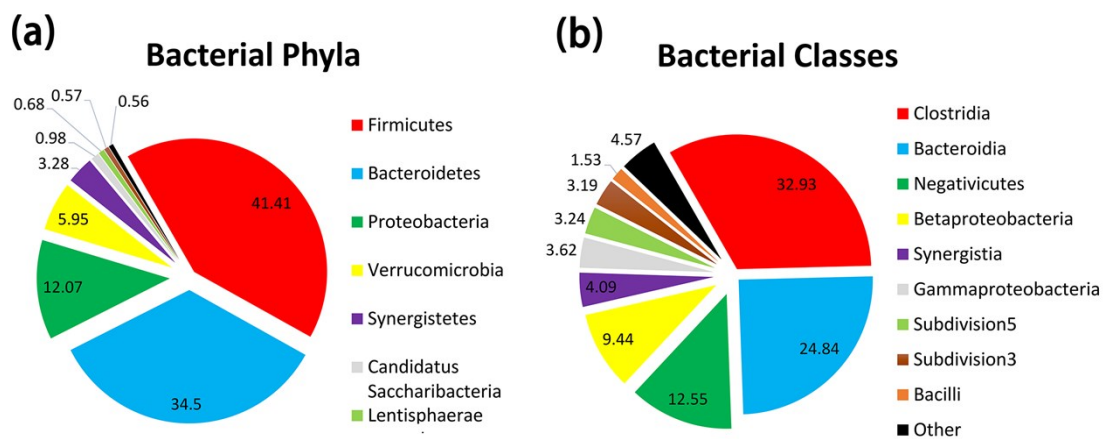

**Fig. S1.** Relative abundance and diversity of bacterial phylum and classes of rumen bacteria used.

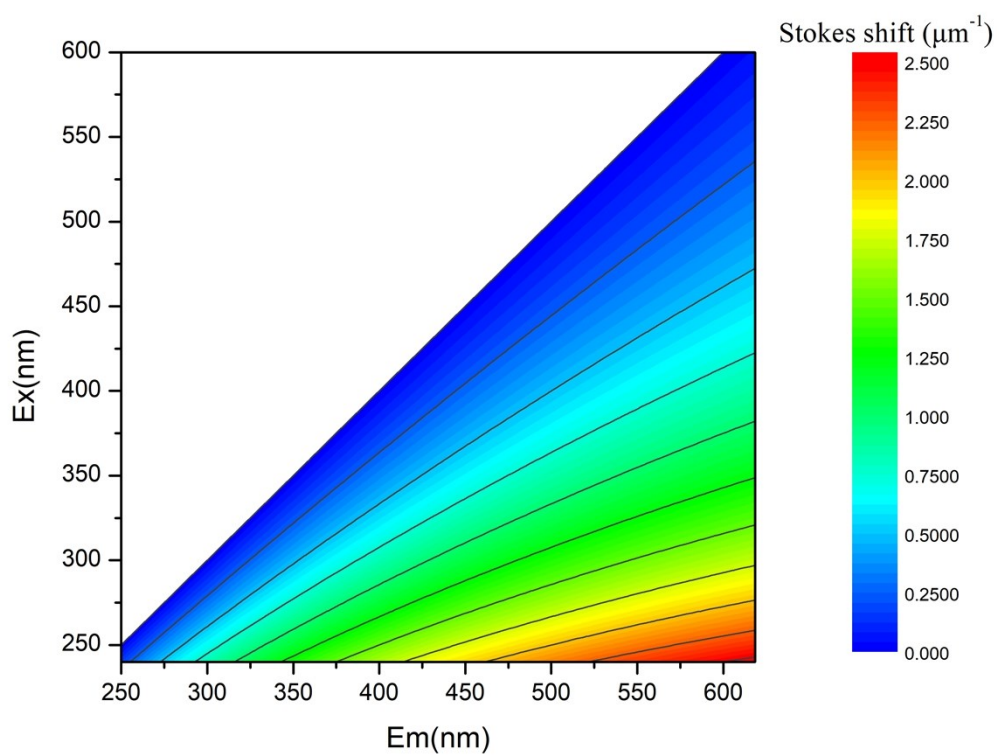

**Fig. S2.** Contour map of Stokes shift.

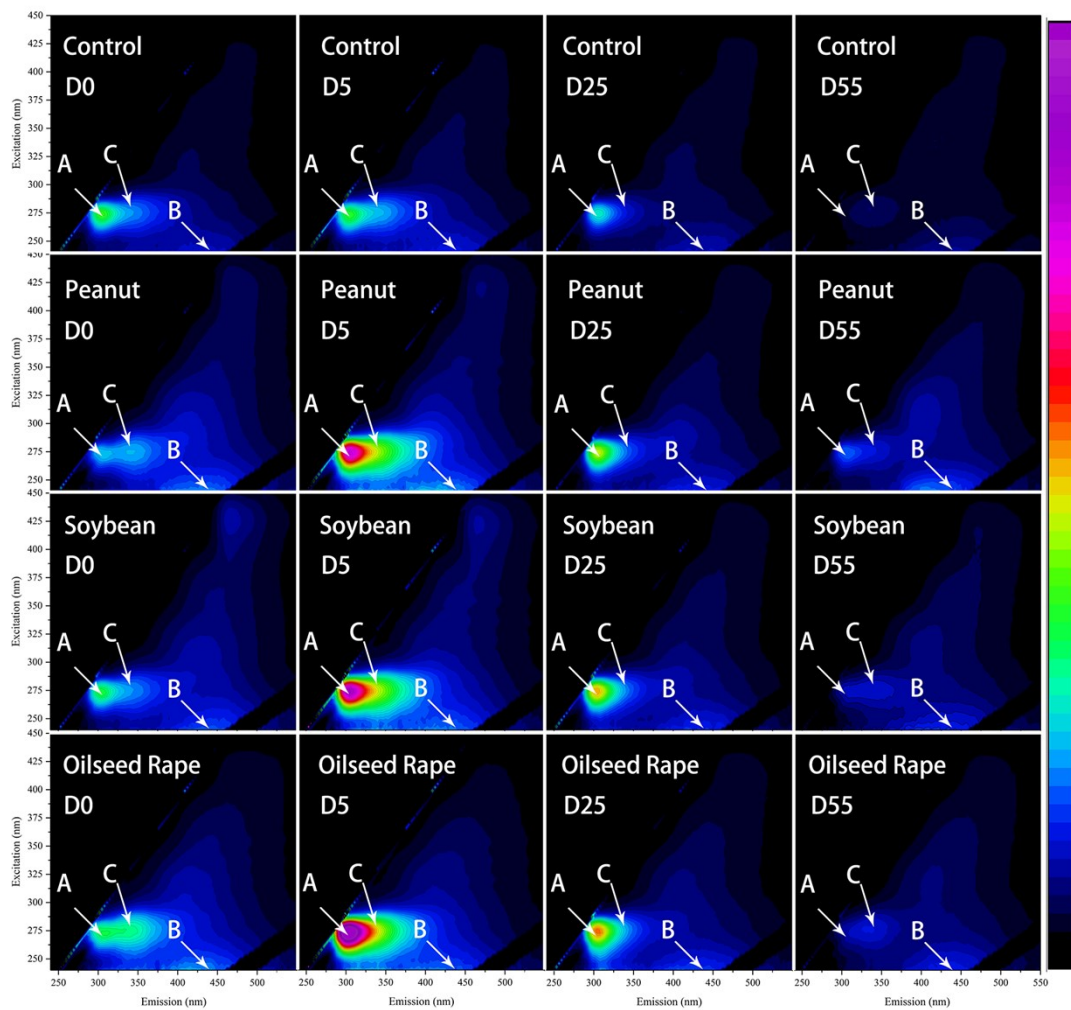

**Fig. S3.** Fluorescence EEMs of DOM in D<sub>0</sub>, D<sub>5</sub>, D<sub>25</sub>, and D<sub>55</sub> samples during anaerobic digestion of oil crop straw.

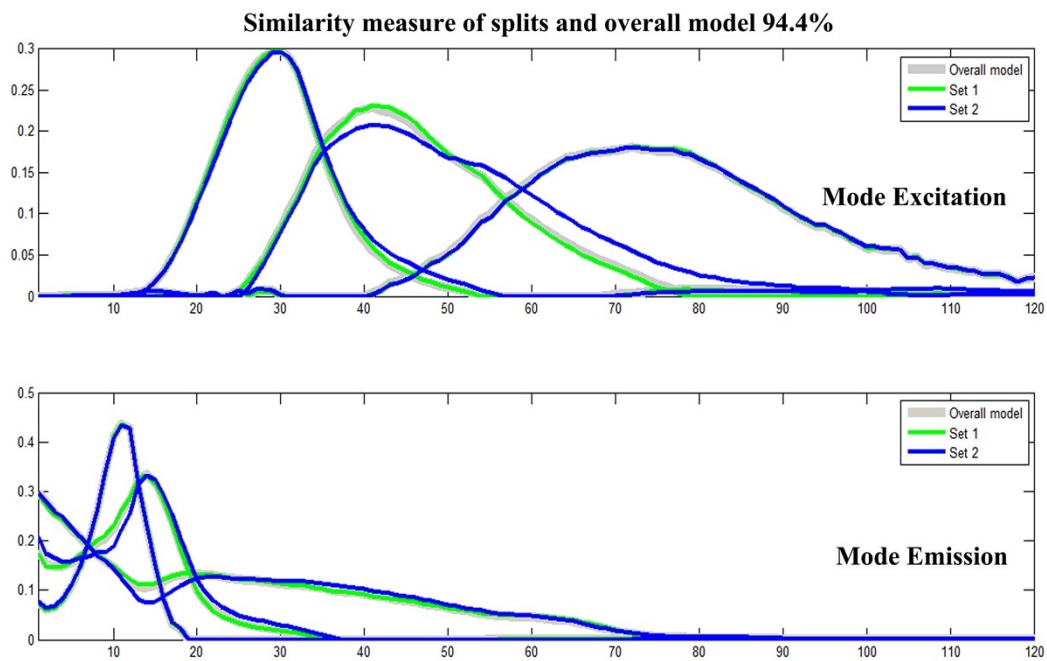

**Fig.S4** split half validation of the three fluorescent components via PARAFAC analysis
